# Supplementary material for: Antisense Oligonucleotide in LNA-Gapmer Design Targeting TGFBR2—A Key Single Gene Target for Safe and Effective Inhibition of TGFβ Signaling
Source: Int J Mol Sci. 2020 Mar 12;21(6):1952. doi: 10.3390/ijms21061952 (PMC7139664; doi:10.3390/ijms21061952)
Supplement: Supplementary file 1 [file ijms-21-01952-s001.pdf]

## Supplementary Data

### Supplementary Table 1

**Supplementary Table 1: BLASTn<sup>1</sup> query results for TGFB2 sequences.** (A) human TGFB2 sequence is highlighted in blue and used as reference for comparison with other species (% identity). (B) shows the TGFB2 percent identity of selected species as a matrix.<sup>1</sup> <https://blast.ncbi.nlm.nih.gov/>; <sup>2</sup> NCBI RefSeq release 98 (January 2020).

#### A

| Accession <sup>2</sup>       | TGFB2 Name                                                                                                                          | Query Coverage | Percent Identity |
|------------------------------|-------------------------------------------------------------------------------------------------------------------------------------|----------------|------------------|
| Select seq<br>NM_003242.6    | Human - Homo sapiens transforming growth factor beta receptor 2 (TGFB2), transcript variant 2, mRNA                                 | 100%           | 100%             |
| Select seq<br>XM_005545564.2 | Cynomolgus monkey - PREDICTED: Macaca fascicularis transforming growth factor beta receptor II (TGFB2), transcript variant X1, mRNA | 99%            | 96%              |
| Select seq<br>XM_005634331.3 | Dog - PREDICTED: Canis lupus familiaris transforming growth factor beta receptor 2 (TGFB2), transcript variant X1, mRNA             | 90%            | 83%              |
| Select seq<br>XM_021071493.1 | Pig - PREDICTED: Sus scrofa transforming growth factor beta receptor 2 (TGFB2), mRNA                                                | 97%            | 79%              |
| Select seq<br>NM_001261151.1 | Rhesus monkey - Macaca mulatta transforming growth factor beta receptor 2 (TGFB2), mRNA                                             | 46%            | 98%              |
| Select seq<br>NM_009371.3    | Mouse - Mus musculus transforming growth factor, beta receptor II (Tgfb2), transcript variant 1, mRNA                               | 79%            | 83%              |
| Select seq<br>NM_031132.3    | Rat - Rattus norvegicus transforming growth factor, beta receptor 2 (Tgfb2), mRNA                                                   | 45%            | 84%              |

#### B

| TGFB2 Percent Identity | Human | Cynomolgus monkey | Dog | Pig | Rhesus monkey | Mouse | Rat |
|------------------------|-------|-------------------|-----|-----|---------------|-------|-----|
| Human                  | 100   | 96                | 83  | 79  | 98            | 83    | 84  |
| Cynomolgus monkey      | 96    | 100               | 82  | 79  | 100           | 82    | 86  |
| Dog                    | 83    | 82                | 100 | 80  | 90            | 83    | 85  |
| Pig                    | 79    | 79                | 80  | 100 | 85            | 85    | 84  |
| Rhesus monkey          | 98    | 100               | 90  | 85  | 100           | 84    | 86  |
| Mouse                  | 83    | 82                | 83  | 85  | 84            | 100   | 93  |
| Rat                    | 84    | 86                | 85  | 84  | 86            | 93    | 100 |

## Supplementary Table 2

**Supplementary Table 2: NVP-13 ASO sequence specificity.** List of sequence comparison with up to 5 false base pairs allowed in all transcripts of human TGFB2, BMP2 and Activin receptor 2 versus ASO X07091 (NVP-13). NVP-13 has 0 mismatches in all human TGFB2 transcripts, 4 mismatches for human BMP2 transcripts and more then 5 mismatches for ACVR2B (therefore not listed). <sup>1</sup>NCBI RefSeq release 98 (January 2020).

| ID     | Oligo length | Accession <sup>1</sup> | Gene ID | Gene symbol | Description                                                                                             | On-target site (5'-3') | Off-target site (5'-3') | Compound sequence (5'-3') | Number of mismatches |
|--------|--------------|------------------------|---------|-------------|---------------------------------------------------------------------------------------------------------|------------------------|-------------------------|---------------------------|----------------------|
| X07091 | 16           | NM_001204.7            | 659     | BMP2        | Homo sapiens bone morphogenetic protein receptor type 2 (BMP2), mRNA                                    | UACUGGUC<br>CAUUCAUG   | UACUAAAA<br>CAUUCAAG    | CATGAATG<br>GACCAGTA      | 4                    |
| X07091 | 16           | XM_011511687.1         | 659     | BMP2        | PREDICTED: Homo sapiens bone morphogenetic protein receptor type 2 (BMP2), transcript variant X1, mRNA  | UACUGGUC<br>CAUUCAUG   | UACUAAAA<br>CAUUCAAG    | CATGAATG<br>GACCAGTA      | 4                    |
| X07091 | 16           | NM_001024847.2         | 7048    | TGFB2       | Homo sapiens transforming growth factor beta receptor 2 (TGFB2), transcript variant 1, mRNA             | UACUGGUC<br>CAUUCAUG   | UACUGGUC<br>CAUUCAUG    | CATGAATG<br>GACCAGTA      | 0                    |
| X07091 | 16           | NM_003242.6            | 7048    | TGFB2       | Homo sapiens transforming growth factor beta receptor 2 (TGFB2), transcript variant 2, mRNA             | UACUGGUC<br>CAUUCAUG   | UACUGGUC<br>CAUUCAUG    | CATGAATG<br>GACCAGTA      | 0                    |
| X07091 | 16           | XM_011534043.2         | 7048    | TGFB2       | PREDICTED: Homo sapiens transforming growth factor beta receptor 2 (TGFB2), transcript variant X1, mRNA | UACUGGUC<br>CAUUCAUG   | UACUGGUC<br>CAUUCAUG    | CATGAATG<br>GACCAGTA      | 0                    |
| X07091 | 16           | XM_011534045.3         | 7048    | TGFB2       | PREDICTED: Homo sapiens transforming growth factor beta receptor 2 (TGFB2), transcript variant X2, mRNA | UACUGGUC<br>CAUUCAUG   | UACUGGUC<br>CAUUCAUG    | CATGAATG<br>GACCAGTA      | 0                    |
| X07091 | 16           | XM_017007106.1         | 7048    | TGFB2       | PREDICTED: Homo sapiens transforming growth factor beta receptor 2 (TGFB2), transcript variant X3, mRNA | UACUGGUC<br>CAUUCAUG   | UACUGGUC<br>CAUUCAUG    | CATGAATG<br>GACCAGTA      | 0                    |

Supplementary Figure 1

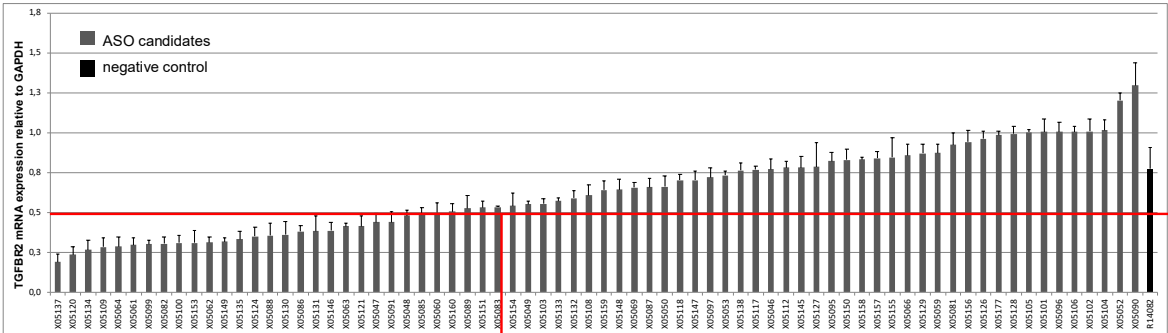

**Supplementary Figure 1: Transfection experiments at low dose (5nM).** After high dose (20nM) transfection experiments with lipofectamine 2000 72 of 110 potential candidates remain for low dose (5nM) lipofectamine 2000 transfection experiments (A549 cells). Remaining TGFBR2 mRNA after 24 hours of incubation with different antisense oligonucleotides (ASO) as measured in a bDNA assay (n = 4) relative to the reference gene GAPDH. Thus, low dose experiments of first screening round revealed 30 active candidates reducing TGFBR2 mRNA by approximately 50 % or more (X05137 – X05083). These 30 candidates were further tested in direct incubation experiments (gymnotic delivery). TGFBR2 expression was normalized to respective PBS-treated control cells. Mean values of n = 4 with SD are shown. XO-number = ASOs, R14082 ASO as negative control directed against Aha-4 with readout for remaining TGFBR2 mRNA.

Supplementary Figure 2

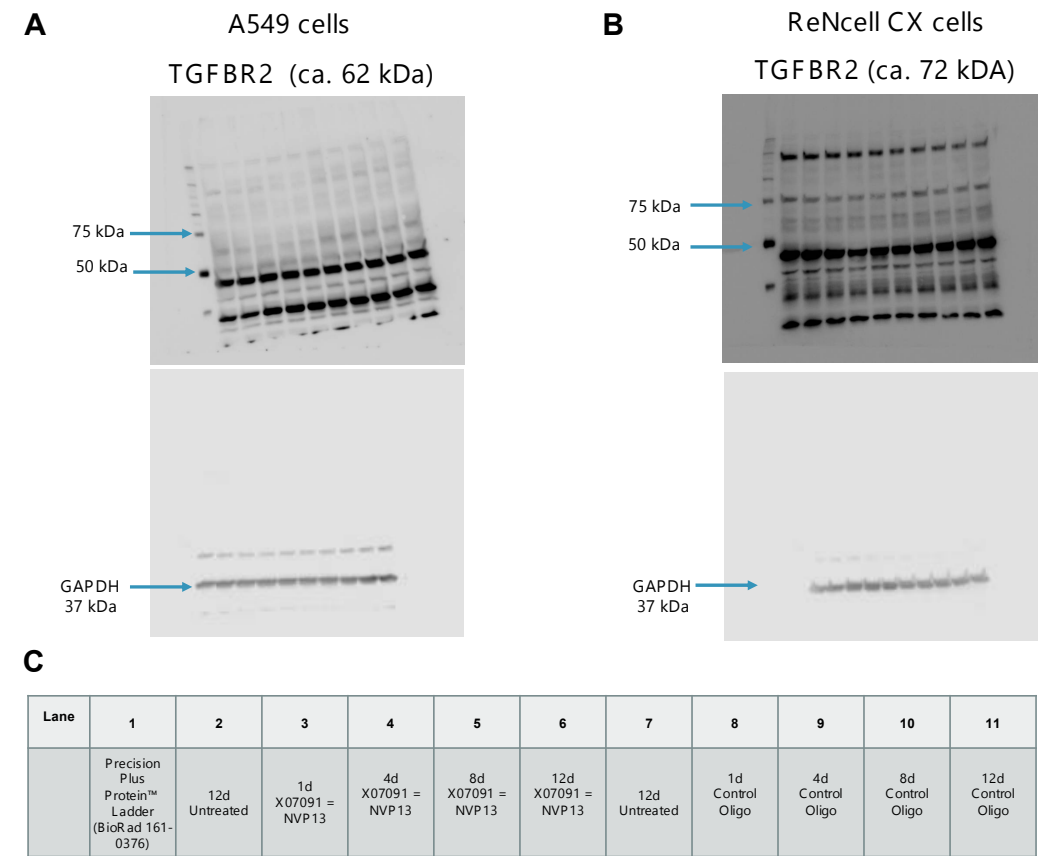

**Supplementary Figure 2: Original Western Blot.** Original Images of Western Blot (WB) against TGFBR2 (Biorybt) and Housekeeper protein GAPDH (cell signaling) in A549 (A) and ReNcell CX® cells (B). All values were normalized to untreated controls and analysis of WB membranes was done by Image studio lite software. (C) SDS-acrylamide gel loading scheme for samples in (A) and (B).

Supplementary Figure 3

A

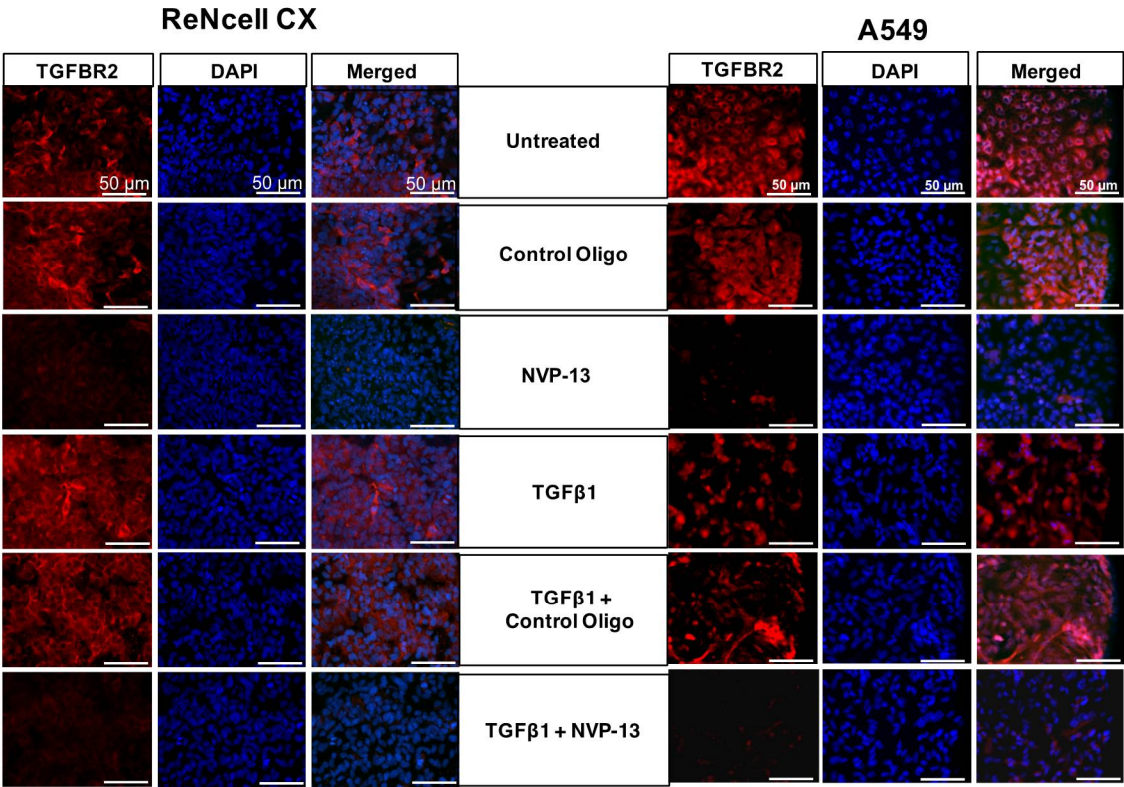

B

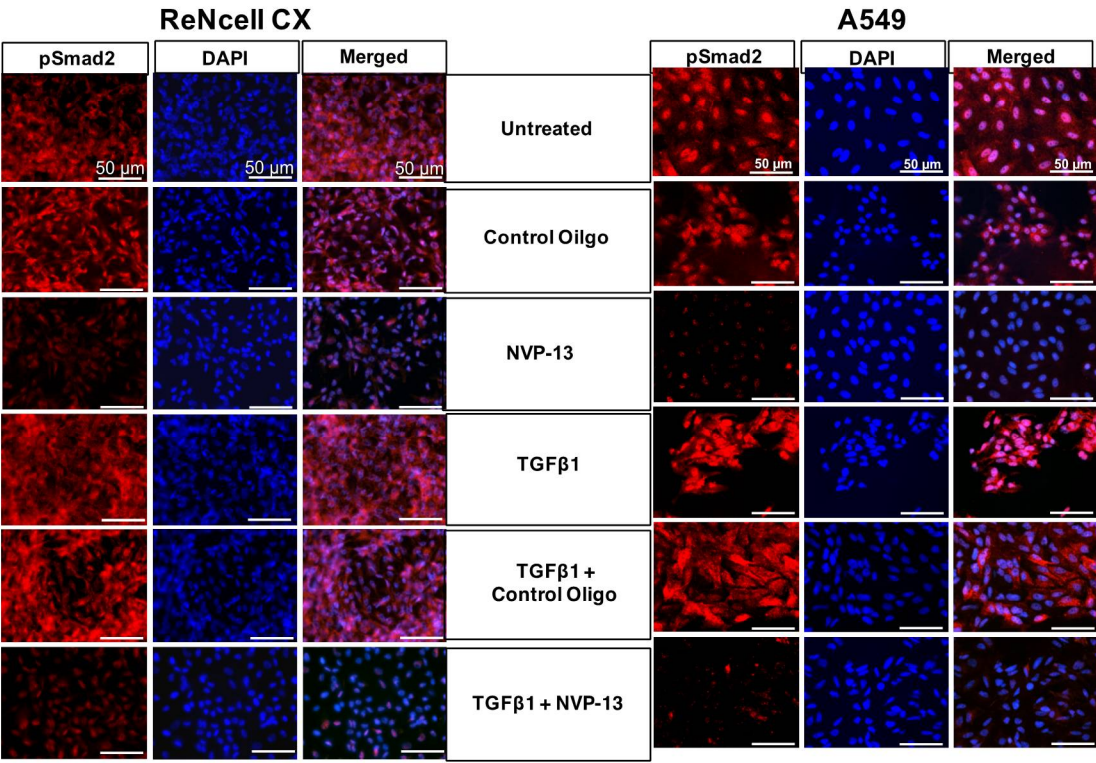

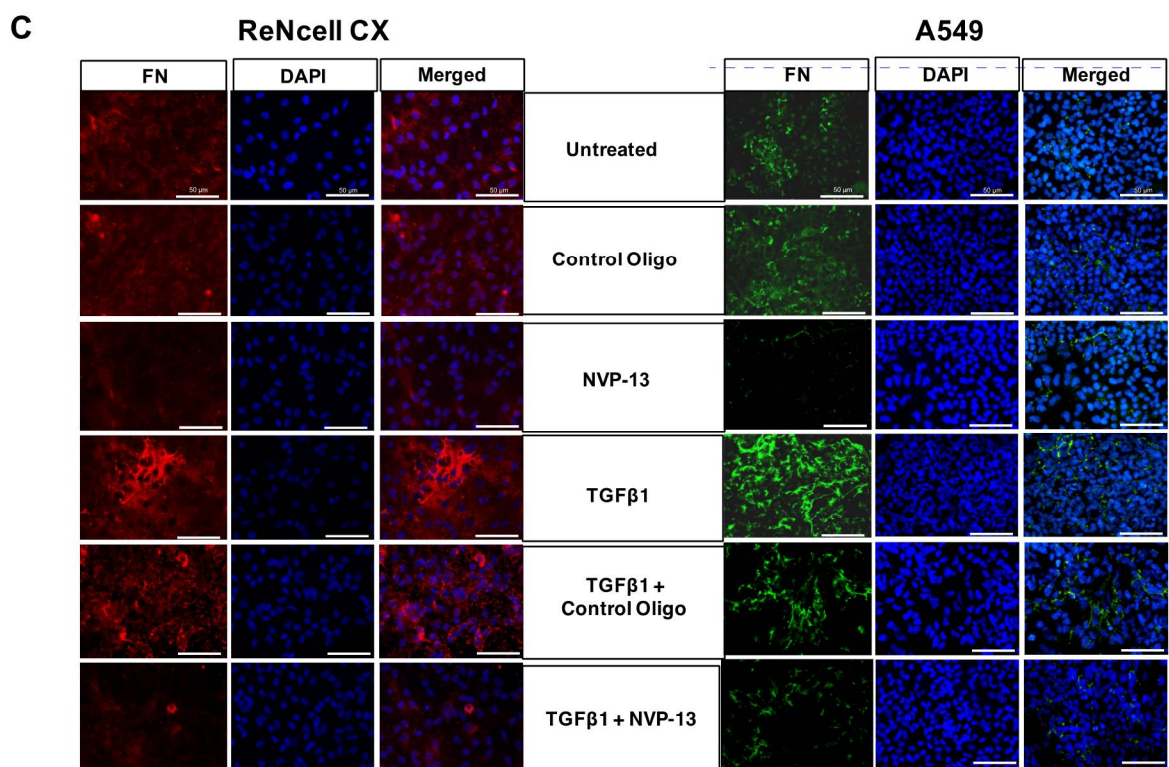

**Supplementary Figure 3: Immunocytochemical stainings against TGFBR2, pSmad2.** (A) shows labeling with an antibody against TGFBR2 (Millipore #06-227, left column; red) in ReNcell CX (left) and A549 (right). Gymnotic transfer of NVP-13 showed an efficient downregulation of target TGFBR2 for both cell lines. (B) Inhibition of TGF $\beta$ -signaling was verified by labeling with an antibody against pSmad2 (cell signaling cs3104s, left column; red) in ReNcell CX (left) and A549 (right). (C) Functional inhibition of TGF $\beta$ -signaling mediated by gymnotic transfer of NVP-13 was confirmed by labeling with an antibody against FN (Proteintech #15613-1-AP, left column) in ReNcell CX (left: red) and A549 (right: green). Nuclear DNA was stained with DAPI (central column, blue). Labeling with antibodies in ReNcell CX (left) and A549 (right) was performed after TGF $\beta$ 1-preincubation (ReNcell CX: 4 d, A549: 48 h) and subsequently gymnotic transfer of NVP-13 for 8 d (ReNcell CX) or 72 h (A549). Nuclear DNA was stained with DAPI (central column, blue). Examination of cells was performed by fluorescence microscopy (Zeiss, Zeiss Axio® Observer.Z1). Images were analyzed with Image J Software and CorelDRAW® X7 Software. N = 3.

## Supplementary Figure 4

**A**

|                             |                                | Purity IP-RP-HPLC-ESI/MS |                                                      |
|-----------------------------|--------------------------------|--------------------------|------------------------------------------------------|
|                             |                                | Rel. Area in %           |                                                      |
| Stock Solution<br>(1 mg/ml) | Time Point (months)            | Rel. Area NVP-13 %       | OOS-Level<br>+/- of relative area<br>from purity T=0 |
| NVP-13 Stock 1              | 0                              | 89.25                    | 0.0 %                                                |
| NVP-13 Stock 2              |                                | 89.11                    | 0.0 %                                                |
| NVP-13 Stock 1              | 1 month                        | 89.82                    | 0.6 %                                                |
| NVP-13 Stock 2              |                                | 87.45                    | 1.9 %                                                |
| NVP-13 Stock 1              | 3 month                        | 89.51                    | 0.3 %                                                |
| NVP-13 Stock 2              |                                | 89.62                    | 0.6 %                                                |
| NVP-13 Stock 1              | 6 months                       | 89.10                    | 0.2 %                                                |
| NVP-13 Stock 2              |                                | 88.98                    | 0.1 %                                                |
| NVP-13 Stock 1              | 6 months<br>(reanalysis batch) | 89.16                    | 0.1 %                                                |
| NVP-13 Stock 2              |                                | 89.19                    | 0.1 %                                                |
| NVP-13 Stock 1              | 12 months                      | 89.09                    | 0.2 %                                                |
| NVP-13 Stock 2              |                                | 89.39                    | 0.3 %                                                |

**B**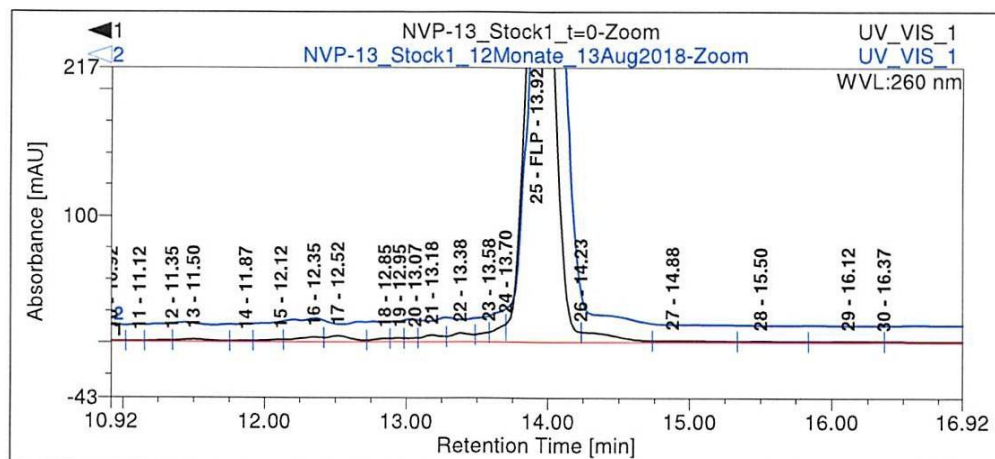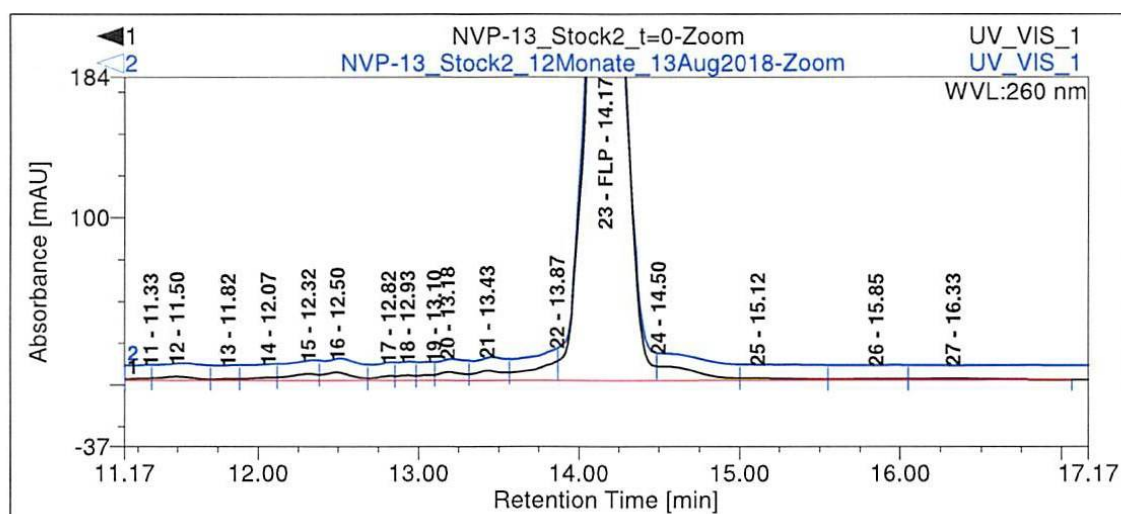

**Supplementary Figure 4: Integrity of NVP-13 at -20°C up to 12 months.** Long-term stability was assessed applying a denaturing Ion-Pair-Reversed-Pair High Performance Liquid Chromatography (IP-RP-HPLC) with Electrospray-Ionization (ESI) / Mass Spectrometry (MS) for determination of relative purity and identity of NVP-13. (A) Aliquots of NVP-13 with a stock solution of approximately 1 mg/ml in 0.9 % NaCl (saline) were stored at -20°C +/- 5°C for 0 (n = 2), 1 (n = 2), 3 (n = 2), 6 (n = 4) and 12 (n = 2) months. The change of relative purity of freshly dissolved aliquot should be  $\leq 10\%$ . Thus, all tested aliquots for NVP-13 was stable at -20°C for up to 12 months. Values are shown as mean, OOS = Out-of-Specification (B) Anion-Exchange High Performance Liquid Chromatography (AEX-HPLC) chromatograms for tested stock1 and 2. NVP-13 concentration was 1 mg/ml. Chromatograms for T = 0 analyses are shown in black. Chromatograms for T =12 months analyses are shown in blue. No differences in chromatogram overlay were detected. Results confirmed that NVP-13 in saline was stable at least for 12 months at -20°C.

## Supplementary Figure 5

**A**

| Stability at 5°C +/- 3°C up to 1 week |                   |                                                 |
|---------------------------------------|-------------------|-------------------------------------------------|
| Stock Solution                        | Time Point (week) | Purity IP-RP-HPLC-UV/MS<br>Rel. Area NVP-13 (%) |
| NVP-13 0.5 mg/ml                      | 0                 | 89.8                                            |
|                                       |                   |                                                 |
| NVP-13 0.57 mg/ml                     | 1                 | 90.4                                            |
| NVP-13 5.70 mg/ml                     |                   | 91.0                                            |

**B**

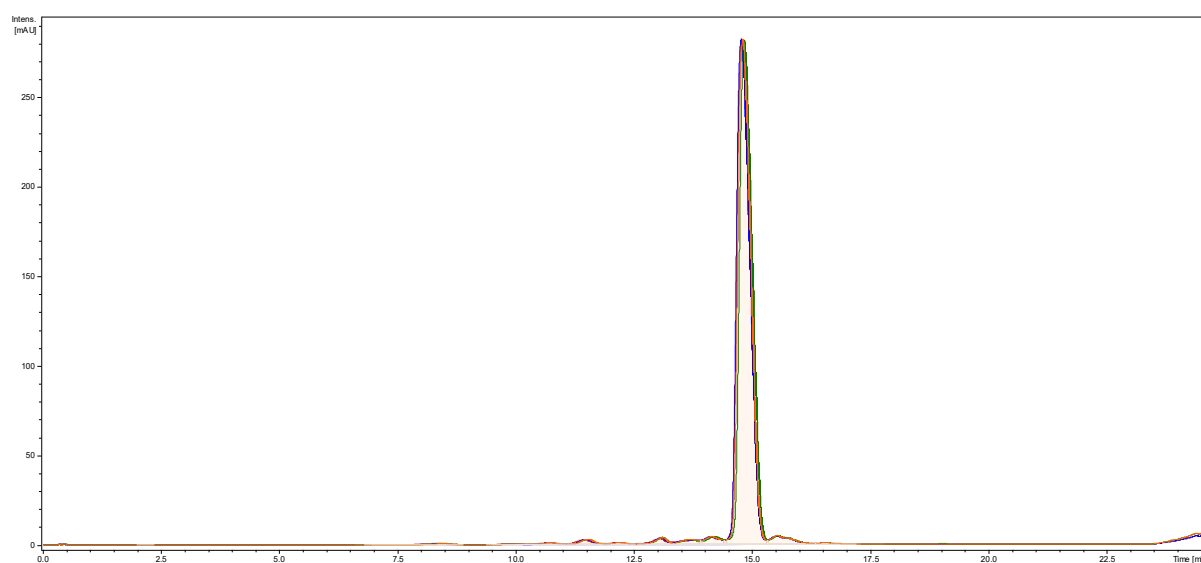

**Supplementary Figure 5: Integrity of NVP-13 at 5°C tested for 1 week.** Integrity was assessed applying a denaturing Ion-Pair-Reversed-Pair High Performance Liquid Chromatography (IP-RP-HPLC) with UV / Mass Spectrometry (MS) for determination of identity of NVP-13. (A) Aliquots of NVP-13 with a stock solution of 0.57 and 5.7 mg/ml in 0.9 % NaCl (saline) were stored at 5°C +/- 3°C for 0 (n = 1) and 1 week (n = 1 of each concentration). The HPLC purity ranged from 90.4 % to 91.0 %. Freshly tested NVP-13 stock solution showed HPLC purity of 89.8 %. Discrepancy for purity/integrity are within the method variability. (B) In an overlay of all chromatograms it is shown that the general peak profile is comparable for all samples. Results confirmed that NVP-13 in saline was stable for at least 1 week at 5°C.

## Supplementary Figure 6

**A**

|                   |                    | Purity IP-RP-UPLC-UV/ESI/MS |               |          |          |
|-------------------|--------------------|-----------------------------|---------------|----------|----------|
|                   |                    | Rel. Area in %              |               |          |          |
| Stock Solution    | Time Point (month) | Full length product         | 3' + 5' (N-2) | 3' (N-1) | 5' (N-1) |
| NVP-13 0.25 mg/ml | 0                  | 95.3                        | 0.6           | 0.8      | 0.9      |
| NVP-13 0.5 mg/ml  | Spiked 0           | 83.7                        | 4.5           | 3.3      | 6.1      |
| NVP-13 0.25 mg/ml | 1 month            | 92.4                        | 0.6           | 0.8      | 0.9      |
| NVP-13 0.5 mg/ml  | Spiked 1 month     | 81.2                        | 4.5           | 3.1      | 6.3      |

**B**

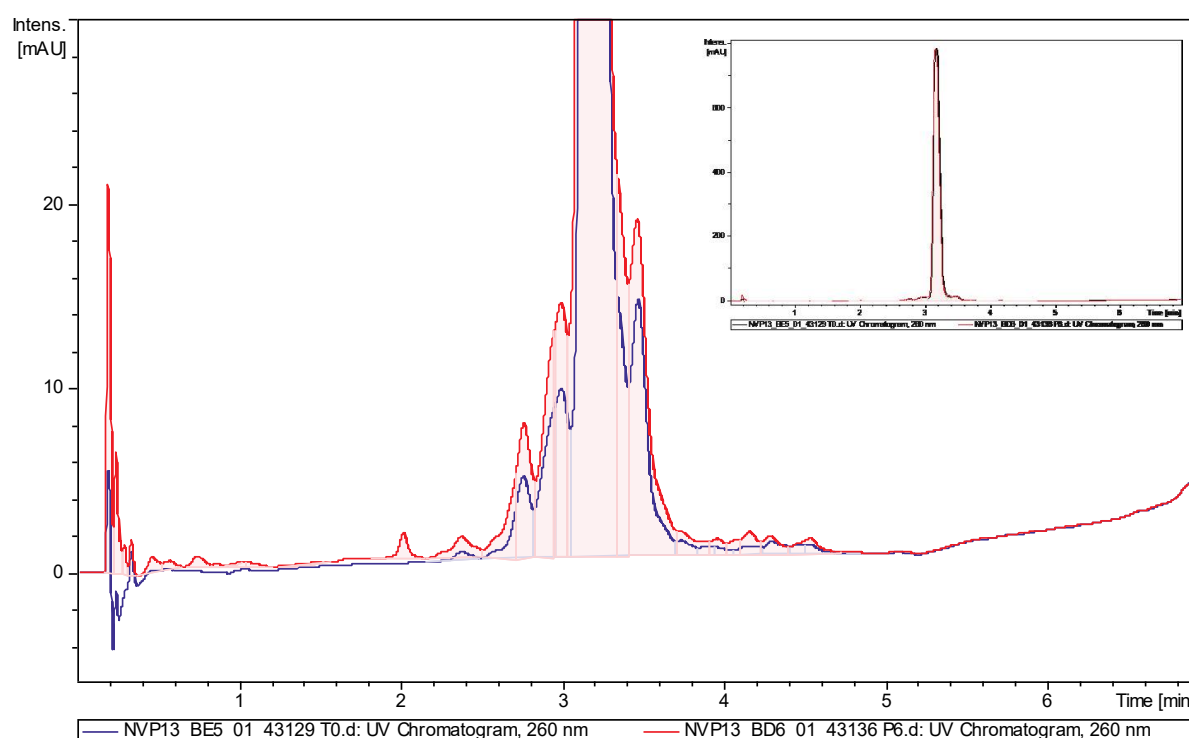

**Supplementary Figure 6: Integrity of NVP-13 at 37°C tested for up to 1 month.** Integrity was assessed applying a denaturing Ion-Pair-Reversed-Pair Ultra-High-Performance Liquid Chromatography (IP-RP-UPLC) with UV / ESI-Mass Spectrometry (MS) for determination of identity of NVP-13. (A) Aliquots were tested for T= 0 (n =1) and 1 month (n =1). Aliquots of both time points were analyzed for full-length product (FLP). Separate samples were spiked with each of three impurities (3' (N-1), 5' (N-1), 3' + 5' (N-2)), in order to calibrate for identification these impurities. No changes in purity or in the relative composition of the reference impurities over 1 month was observed. (B) Overlays of T=0 (blue curves) and T= 1 month (red curve) IPRP-UPLC chromatograms for NVP-13. Inset confirm exact overlap of FLP peak (main peak) (ordinate axis, 800 mAU full-scale); main panel chromatograms are shown with ordinate axes at 30 mAU full-scale in order to highlight details inside peaks. Results confirmed that NVP-13 in saline was stable for at least 1 month at 37°C.
